# Supplementary material
Source: PubMed Central journal article supplement (PMC6279623)

A

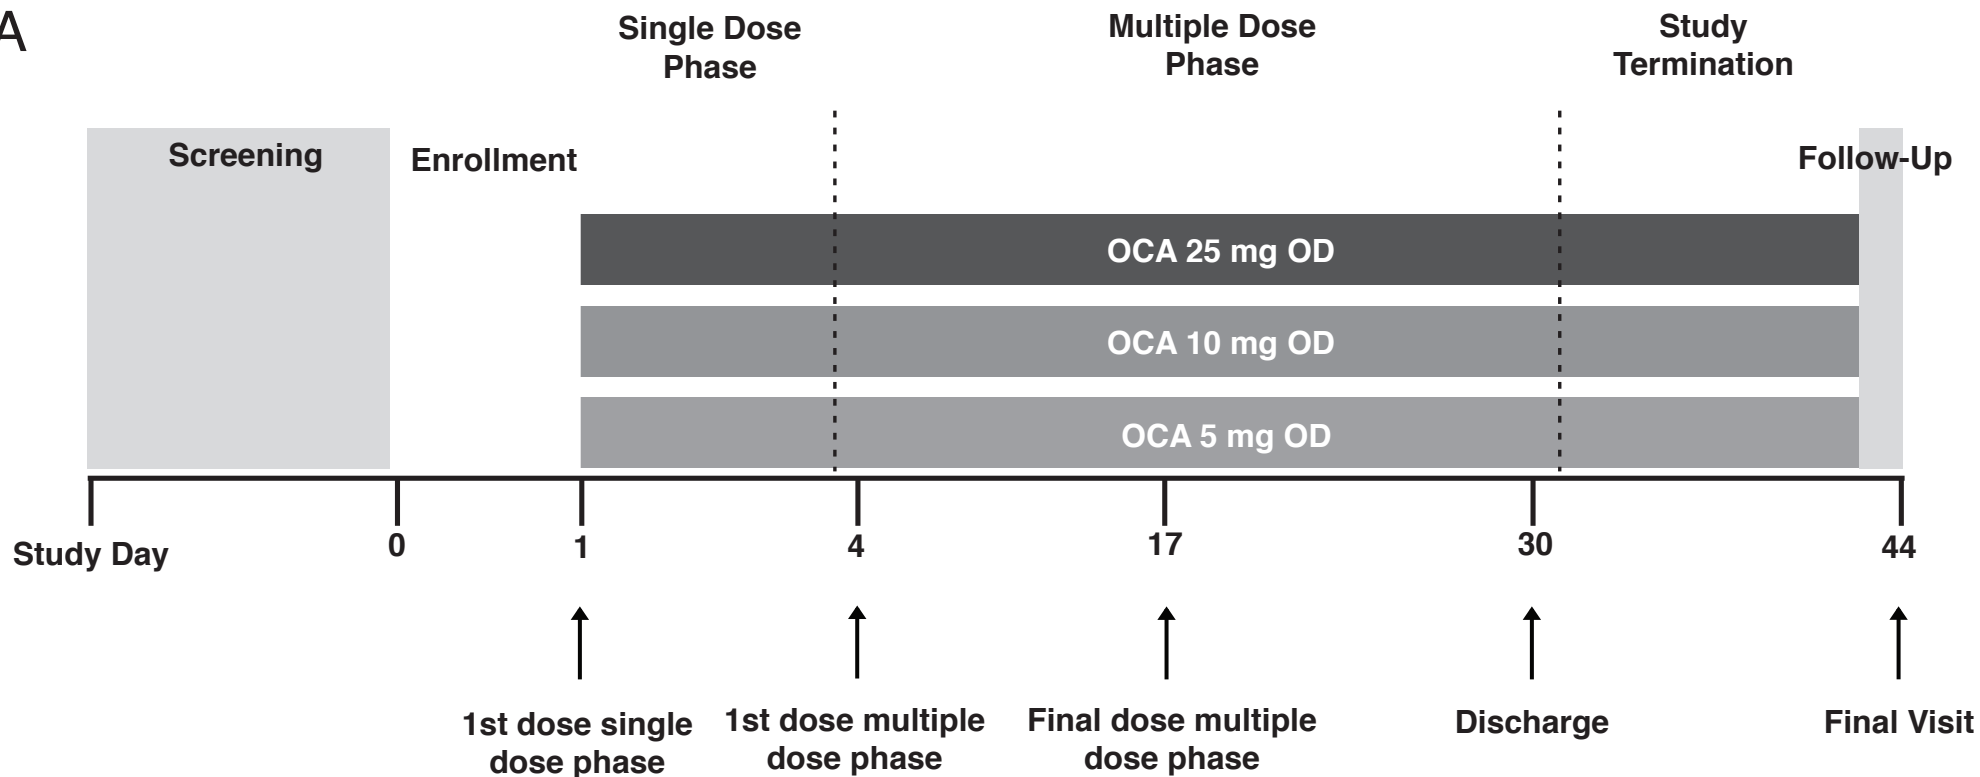

B

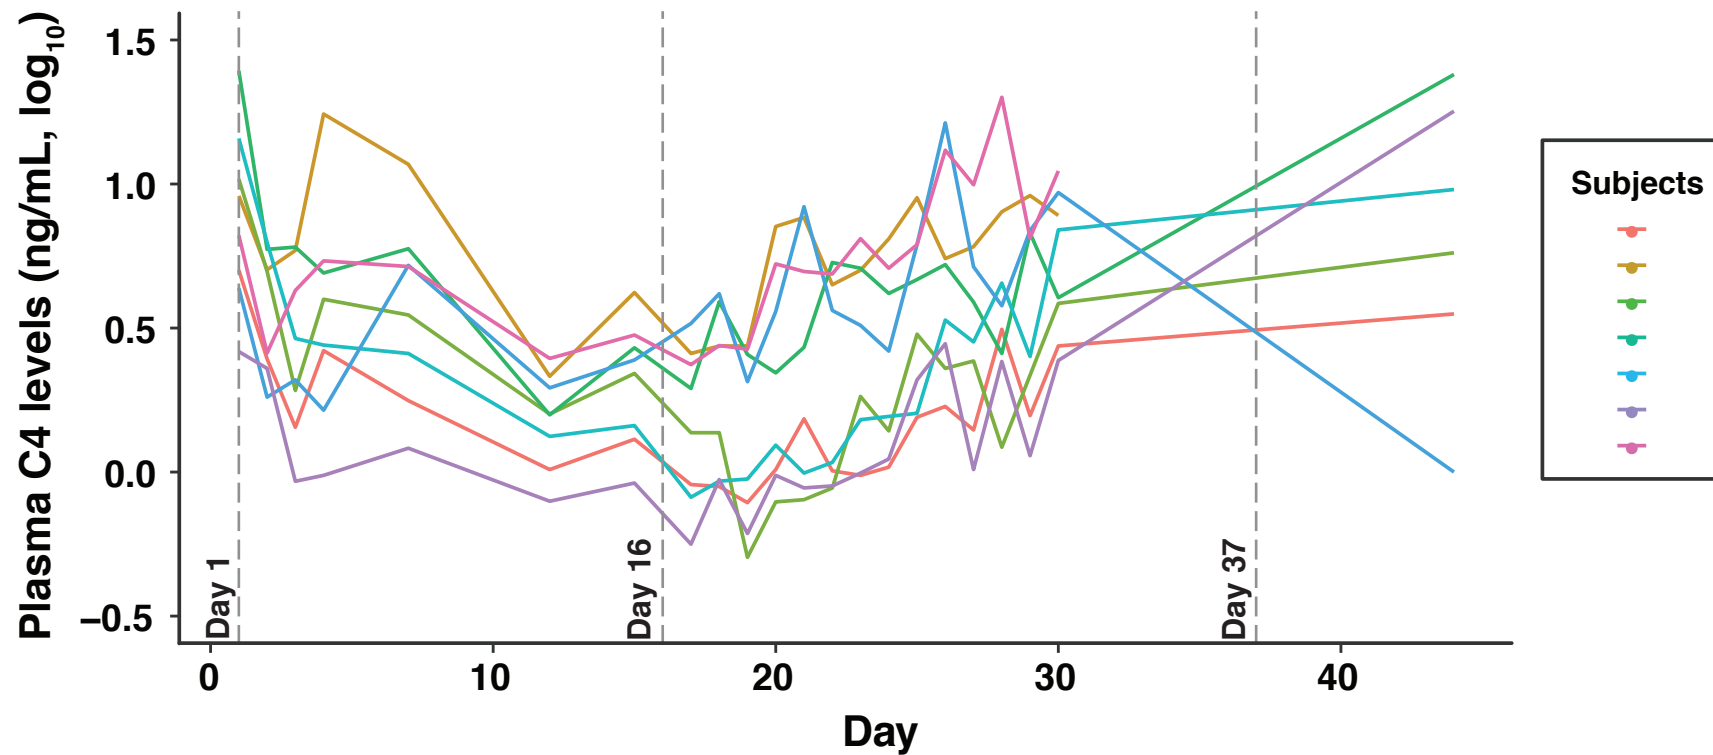

Supplement: NIHMS1504455-supplement-2.pdf [file NIHMS1504455-supplement-2.pdf]

Relative abundance

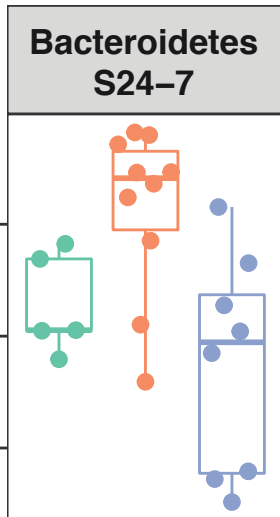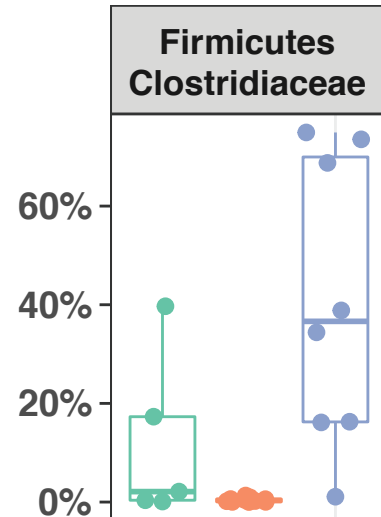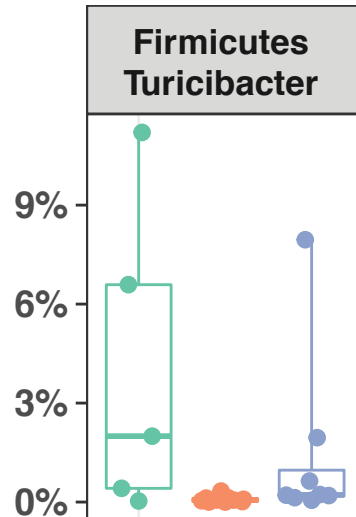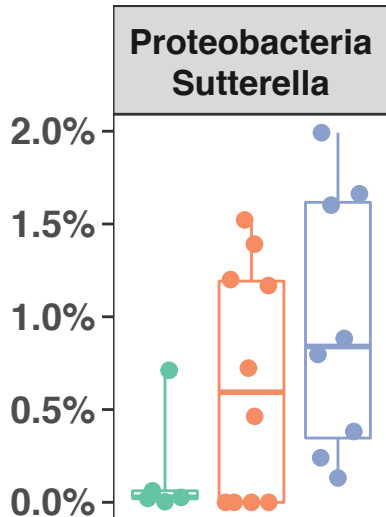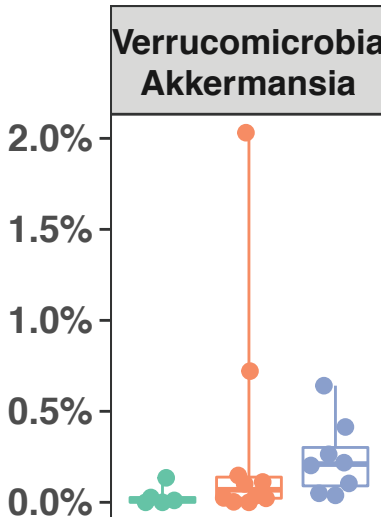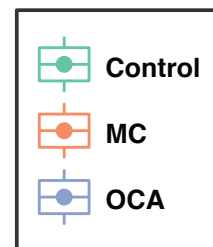

Supplement: NIHMS1504455-supplement-3.pdf [file NIHMS1504455-supplement-3.pdf]

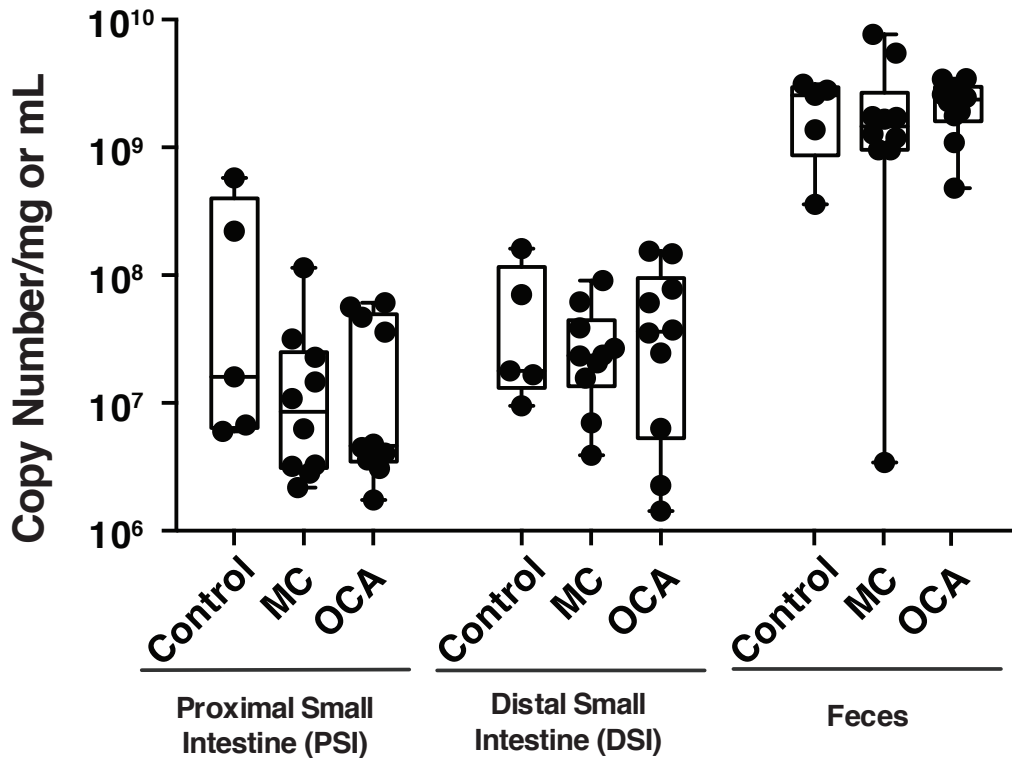

Supplement: NIHMS1504455-supplement-4.pdf [file NIHMS1504455-supplement-4.pdf]

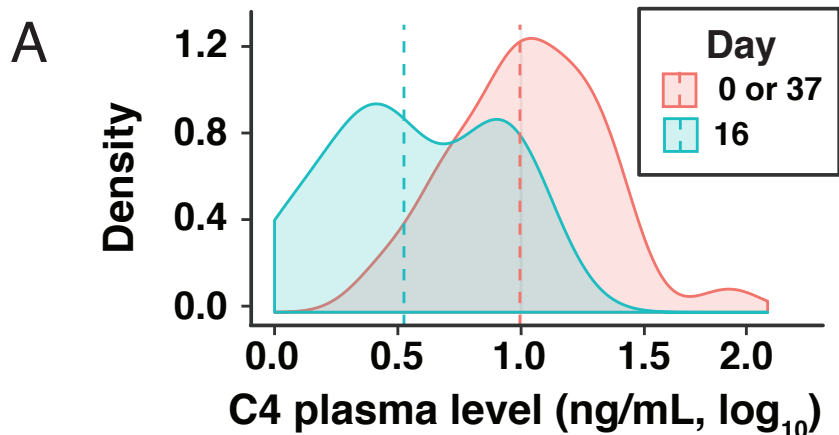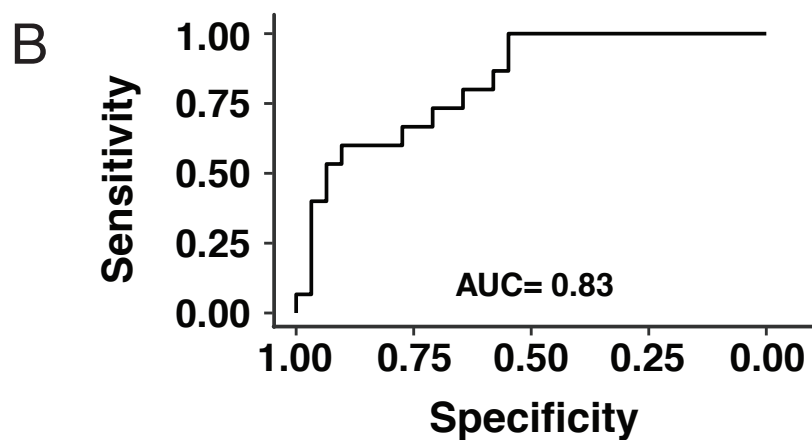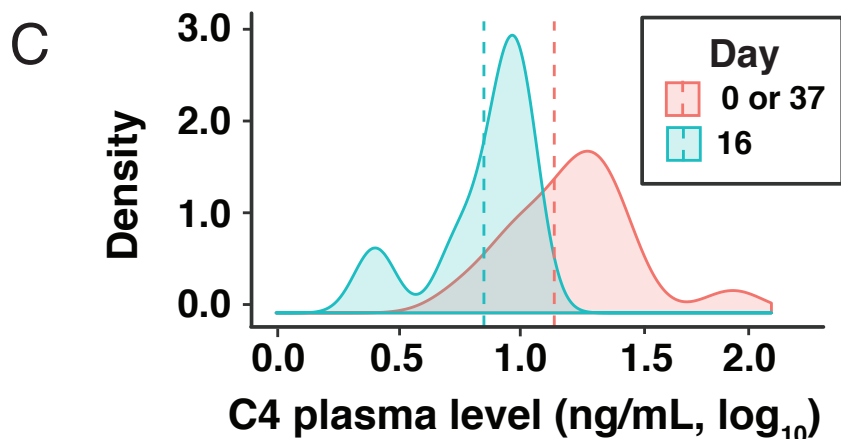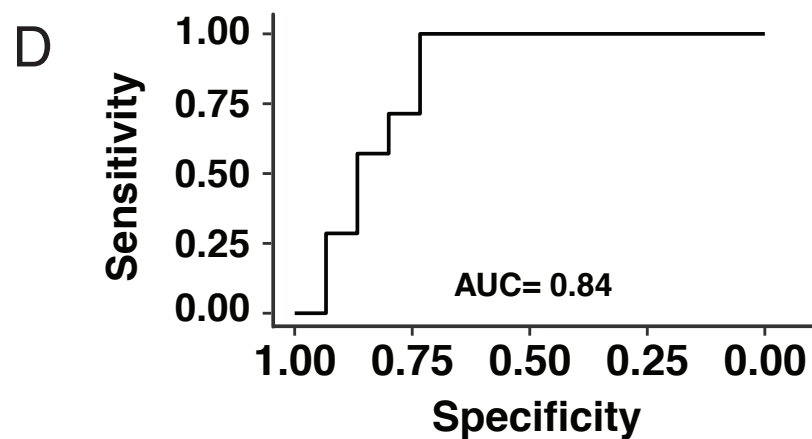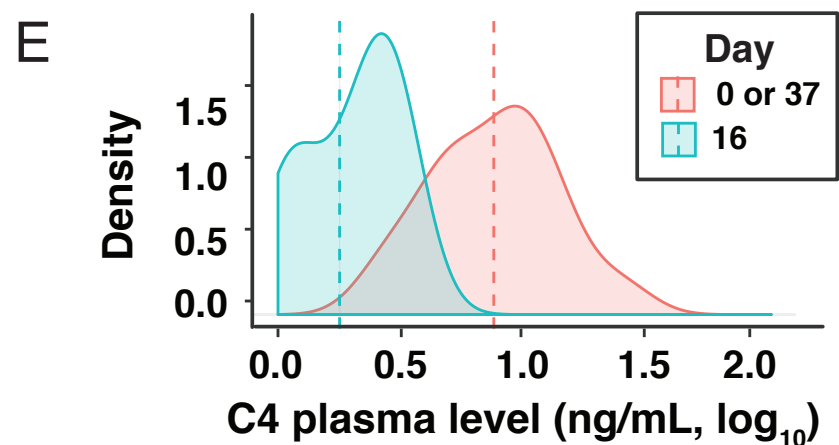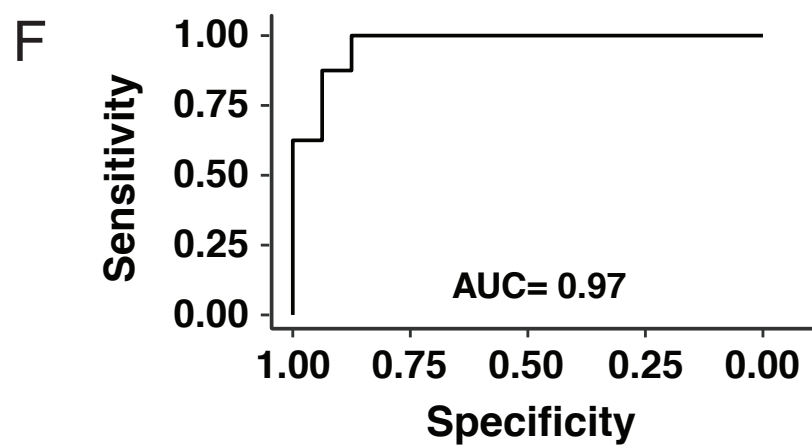

Supplement: NIHMS1504455-supplement-5.pdf [file NIHMS1504455-supplement-5.pdf]
